# Supplementary material for: Essential Oils Distilled from Colombian Aromatic Plants and Their Constituents as Penetration Enhancers for Transdermal Drug Delivery
Source: MDPI journal article supplement (doi:10.3390/molecules28062872), 2023-03-22
Supplement: s1 [file s1]

**Table S1.** Relative amounts (%) and linear retention indices (LPIs) of the principal compounds present in the essential oils studied.

| Compound                               | LRIs           |                   |                    |                   | Relative GC peak áreas, % |      |      |      |      |      |      |      |
|----------------------------------------|----------------|-------------------|--------------------|-------------------|---------------------------|------|------|------|------|------|------|------|
|                                        | Polar column** |                   | Nonpolar column*** |                   | EO1                       | EO2  | EO3  | EO4  | EO5  | EO8  | EO9  | EO19 |
|                                        | Exp.           | Lit. <sup>a</sup> | Exp.               | Lit. <sup>a</sup> |                           |      |      |      |      |      |      |      |
| $\alpha$ -Pinene*                      | 937            | 921–944           | 1021               | 1008–1039         | 24.9                      | -    | 2.0  | 5.1  | 4.6  | 0.4  | 1.7  | 0.2  |
| Camphene*                              | 952            | 936–959           | 1066               | 1043–1086         | 0.2                       | -    | 2.5  | -    | -    | 0.2  | -    | -    |
| Sabinene*                              | 976            | 961–981           | 1119               | 1098–1140         | 4.6                       | -    | 0.5  | -    | -    | -    | -    | -    |
| $\beta$ -Pinene                        | 982            | 964–988           | 1108               | 1085–1130         | 14.8                      | -    | 0.4  | -    | 1.2  | -    | -    | -    |
| $\beta$ -Myrcene*                      | 990            | 980–995           | 1160               | 1140–1175         | 1.3                       | 0.2  | 0.9  | 1.3  | 1.5  | 2.4  | 1.3  | 2.1  |
| $\alpha$ -Phellandrene*                | 1009           | 995–1013          | 1163               | 1148–1186         | 6.3                       | -    | 9.3  | -    | 4.4  | -    | 7.1  | -    |
| $\Delta^3$ -Carene                     | 1011           | 1002–1025         | 1146               | 1122–1169         | 0.3                       | 0.2  | -    | -    | 0.6  | 0.1  | 0.7  | -    |
| $\alpha$ -Terpinene*                   | 1019           | 1007–1026         | 1177               | 1154–1195         | -                         | 1.3  | -    | -    | 0.8  | 1.7  | 0.5  | 0.7  |
| p-Cymene*                              | 1028           | 1011–1033         | 1267               | 1246–1291         | 4.5                       | 3.0  | 8.7  | 0.5  | 3.0  | 14.4 | 12.6 | 10.5 |
| Limonene*                              | 1033           | 1019–1039         | 1197               | 1178–1219         | 2.4                       | -    | 4.4  | 17.6 | 6.0  | 0.3  | 2.1  | 0.3  |
| $\beta$ -Phellandrene                  | 1036           | 1011–1043         | 1206               | 1188–1233         | 10.1                      | -    | 3.1  | -    | -    | -    | 1.4  | -    |
| 1,8-Cineole*                           | 1037           | 1021–1044         | 1212               | 1186–1231         | -                         | -    | 6.5  | 19.1 | 3.6  | 1.3  | 13.0 | 0.3  |
| $\gamma$ -Terpinene*                   | 1061           | 1049–1069         | 1244               | 1222–1266         | -                         | 0.6  | 1.0  | -    | 0.8  | 5.3  | 2.4  | 2.0  |
| Linalool*                              | 1099           | 1088–1109         | 1545               | 1507–1564         | -                         | -    | 0.5  | 1.3  | 0.4  | 1.0  | 0.7  | 0.2  |
| Terpinen-4-ol*                         | 1186           | 1165–1189         | 1603               | 1564–1630         | -                         | -    | 0.4  | -    | 0.3  | 0.5  | 0.9  | 0.7  |
| Thymyl methyl ether                    | 1232           | 1229–1240         | 1588               | 1563–1607         | -                         | -    | -    | -    | -    | 1.9  | 0.8  | 0.9  |
| Piperitone                             | 1264           | 1245–1266         | 1738               | 1689–1748         | -                         | -    | -    | -    | 14.8 | -    | -    | -    |
| Thymol*                                | 1290           | 1272–1304         | 2166               | 2100–2205         | -                         | -    | -    | -    | -    | 8.0  | 14.0 | 71.7 |
| Carvacrol *                            | 1301           | 1291–1314         | 2193               | 2140–2246         | -                         | -    | -    | -    | -    | 35.0 | 0.9  | 4.4  |
| $\alpha$ -Copaene                      | 1386           | 1363–1391         | 1497               | 1462–1522         | 2.6                       | -    | 1.1  | 3.2  | 2.9  | 0.7  | 0.6  | -    |
| $\beta$ -Elemene                       | 1397           | 1374–1402         | 1593               | 1565–1608         | -                         | 4.0  | 1.0  | -    | 0.7  | -    | -    | -    |
| <i>trans</i> - $\beta$ -Caryophyllene* | 1435           | 1405–1440         | 1603               | 1569–1632         | 3.1                       | 4.0  | 18.6 | 6.3  | 7.4  | 4.4  | 15.1 | 1.3  |
| $\alpha$ -Humulene*                    | 1469           | 1435–1470         | 1675               | 1637–1689         | 1.5                       | -    | 10.1 | 1.2  | 1.5  | 1.1  | 8.1  | 0.6  |
| $\gamma$ -Muurolene                    | 1482           | 1461–1487         | 1691               | 1655–1714         | 0.2                       | -    | 1.2  | 0.9  | 1.5  | -    | 0.6  | -    |
| Aristolochene                          | 1483           | 1487 <sup>b</sup> | 1687               | -                 | -                         | 17.9 | -    | -    | -    | -    | -    | -    |

| Compound                             | LRIs           |                   |                    |                   | Relative GC peak áreas, % |      |     |     |     |     |     |      |
|--------------------------------------|----------------|-------------------|--------------------|-------------------|---------------------------|------|-----|-----|-----|-----|-----|------|
|                                      | Polar column** |                   | Nonpolar column*** |                   |                           |      |     |     |     |     |     |      |
|                                      | Exp.           | Lit. <sup>a</sup> | Exp.               | Lit. <sup>a</sup> | EO1                       | EO2  | EO3 | EO4 | EO5 | EO8 | EO9 | EO19 |
| Germacrene D*                        | 1494           | 1464–1493         | 1710               | 1676–1726         | 13.1                      | -    | 2.2 | -   | 1.7 | -   | 0.9 | -    |
| Premnaspirodien                      | 1498           | 1505 <sup>b</sup> | 1725               | -                 | -                         | 3.7  | -   | -   | -   | -   | -   | -    |
| β-Selinene                           | 1501           | 1473–1496         | 1723               | 1686–1743         | -                         | 5.2  | 1.2 | 2.5 | -   | 0.3 | 0.5 | -    |
| Valencene                            | 1505           | 1477–1507         | 1713               | 1688–1761         | -                         | 7.4  | -   | 0.3 | 1.2 | -   | -   | -    |
| α-Selinene                           | 1509           | 1477–1510         | 1726               | 1696–1748         | -                         | 1.6  | 0.9 | 1.7 | -   | 0.8 | -   | -    |
| γ-Cadinene                           | 1524           | 1498–1531         | 1760               | 1735–1782         | 0.2                       | -    | 0.9 | 0.4 | 0.7 | 0.3 | 0.5 | -    |
| δ-Cadinene                           | 1527           | 1508–1539         | 1755               | 1722–1774         | 1.0                       | -    | 2.0 | 1.2 | 5.5 | 1.1 | 1.2 | -    |
| Selina-3,7(11)-diene                 | 1551           | 1531–1546         | 1780               | 1750–1800         | -                         | -    | -   | 2.8 | -   | -   | -   | -    |
| <i>trans</i> -Nerolidol*             | 1563           | 1539–1570         | 2035               | 1995–2055         | -                         | -    | -   | 3.5 | -   | 0.7 | 0.9 | -    |
| Caryophyllene oxide*                 | 1597           | 1563–1595         | 1981               | 1936–2023         | 0.8                       | 3.2  | 3.8 | 0.7 | 3.8 | 0.9 | 2.5 | 1.6  |
| Guaiol*                              | 1606           | 1585–1615         | 2084               | 2061–2104         | -                         | 3.5  | 0.5 | -   | -   | -   | 0.6 | -    |
| Viridiflorol                         | 1610           | 1569–1604         | 2097               | 2041–2110         | 0.3                       | -    | -   | 5.7 | 6.5 | -   | -   | -    |
| β-Eudesmol                           | 1670           | 1637–1664         | 2213               | 2196–2272         | -                         | -    | 1.5 | 0.7 | 0.8 | 0.3 | 2.6 | 0.2  |
| Germacra-4,5,10-trien-1-α-ol         | 1680           | 1686 <sup>b</sup> | 2365               | -                 | -                         | 3.5  | -   | -   | -   | -   | -   | -    |
| Dehydrofukinone                      | 1827           | 1820 <sup>c</sup> | 2448               | 2404 <sup>c</sup> | -                         | 25.4 | -   | -   | -   | -   | -   | -    |
| <i>trans,trans</i> -Geranyl linalool | 2028           | 2026 <sup>b</sup> | -                  | 2551 <sup>c</sup> | -                         | -    | -   | 4.0 | -   | -   | -   | -    |

**Exp.** – Experimental LRI; **Lit.** - Literature. \* Confirmatory identification based on the use of standard compounds. \*\* DB-WAX Column (60 m). \*\*\* DB-5MS Column (60 m).

<sup>a</sup> [ 90% LRI range] V. I. Babushok, P. J. Linstrom and I. G. Zenkevich (2011) Retention Indices for Frequently Reported Compounds of Plant Essential Oils, J. Phys. Chem. Ref. Data, 40, 043101. <https://doi.org/10.1063/1.3653552>.

<sup>b</sup> R. P. Adams (2007) Identification of essential oil components by gas chromatography/mass spectrometry. 4<sup>th</sup> Ed., Allured Publisher, Carol Stream, IL, U.S.A., pp. 1-809. <https://doi.org/10.1016/j.jasms.2005.07.008>.

<sup>c</sup> W. Wallace (2017) NIST Standard Reference Database 1A. Version 2.3.
